# Supplementary material for: Depletion rates of O2-naphthenic acids from oil sands process-affected water in wetland microcosms
Source: Royal Society of Chemistry journal article supplement (doi:10.1039/d4em00227j), 2024-01-01
Supplement: d4em00227j1.pdf [file d4em00227j1.pdf]

## Supplementary Information

Depletion rates of O<sub>2</sub>-naphthenic acids from oil sands process-affected water in wetland microcosms

Alexander M. Cancelli and Frank A.P.C. Gobas

The School of Resource and Environmental Management, Simon Fraser University, 8888 University Drive Burnaby, British Columbia, Canada V5A 1S6

Figures: 3

Tables: 3

Pages: 6

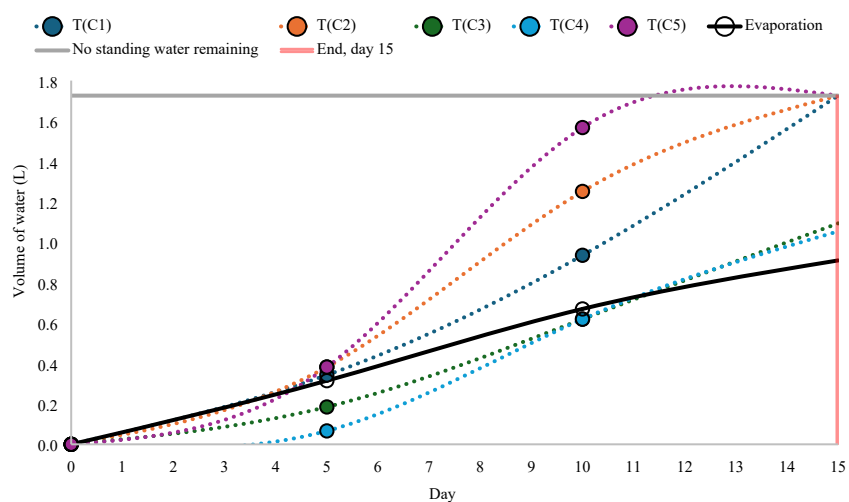

14

15 **Figure S1:** Transpiration of OSPW through cattails over time in plant reactors (n = 5).

16

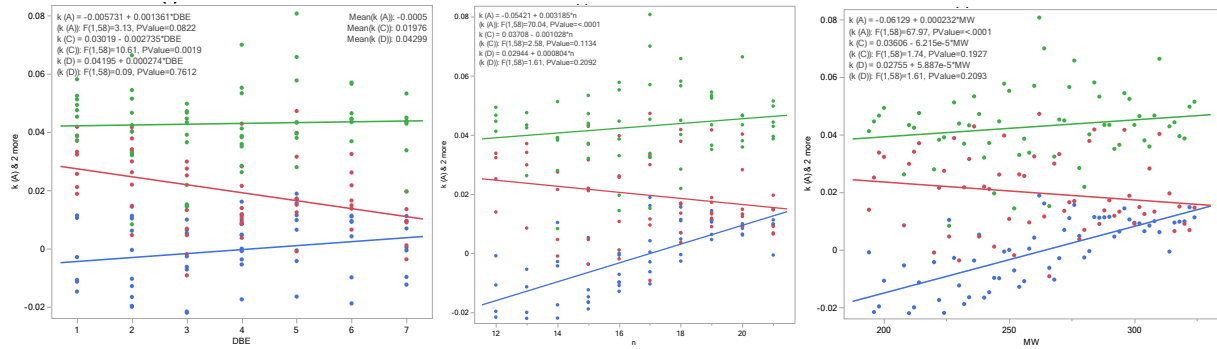

17

18 **Figure S2:** Linear regression of first-order depuration rate constants ( $k_{dep}$ ) as a function of  
19 double bond equivalents (DBE), carbon number ( $n$ ), and molecular weight (MW, g/mol). Blue =  
20 OSPW only; Red = OSPW with peat soil; Green = cattail microcosm reactors.

21

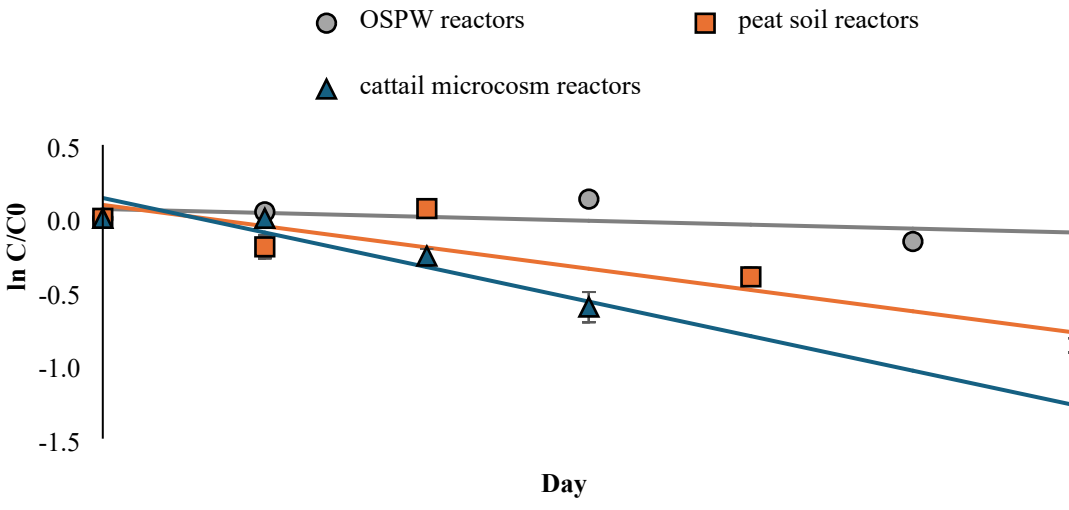

22

23 **Figure S3:** Normalized concentration of total (sum) O<sub>2</sub>-naphthenic acids in POCIS ( $C$ ) to initial  
24 concentrations of total (sum) O<sub>2</sub>-naphthenic acids in POCIS on day 0 ( $C_0$ ) from OSPW reactors,  
25 peat soil reactors, and cattail microcosm reactors over time. Error bars on data points represent  
26 standard error of the mean total (sum) of O<sub>2</sub>-naphthenic acids concentration.

27

28

29 Table S1: Weight of plant reactor components for all experimental units (group C) containing  
 30 cattails.

| rep                                                                               | 1      | 2      | 3      | 4      | 5      |
|-----------------------------------------------------------------------------------|--------|--------|--------|--------|--------|
| Weight of Soil +<br>belowground<br>biomass (g)                                    | 1513.4 | 1471.0 | 1979.5 | 1599.3 | 1593.2 |
| Weight of<br>aboveground<br>biomass (g)                                           | 6.9    | 6.5    | 5.0    | 5.8    | 8.6    |
| Weight of<br>belowground<br>biomass (g)                                           | 22.8   | 13.3   | 12.1   | 27.5   | 19.6   |
| Weight of soil in<br>reactor (g)                                                  | 1490.6 | 1457.6 | 1967.4 | 1571.8 | 1573.6 |
| Weight of above-<br>and below-ground<br>biomass (g)                               | 29.7   | 19.8   | 17.1   | 33.3   | 28.2   |
| Total weight of plant<br>reactor (soil + above-<br>+ below-ground<br>biomass) (g) | 1520.3 | 1477.4 | 1984.5 | 1605.1 | 1601.8 |

31

32

33

34

35 **Table S2:** Rate of depuration ( $k_{\text{dep}}$ ;  $\text{day}^{-1}$ ) from OSPW in microcosm reactors with OSPW,  
 36 OSPW and peat soil, and OSPW with cattail and peat soil by carbon number and double bond  
 37 equivalent. Negative  $k_{\text{dep}}$  indicates the concentration of the O2-naphthenic acid was found to  
 38 increase over time.

| n  | DBE | Chemical | OSPW reactors    |        | Peat soil reactors |        | Cattail microcosm reactors |        |
|----|-----|----------|------------------|--------|--------------------|--------|----------------------------|--------|
|    |     |          | $k_{\text{dep}}$ | SE (k) | $k_{\text{dep}}$   | SE (k) | $k_{\text{dep}}$           | SE (k) |
| 12 | 1   | C12H24O2 | 0.001            | 0.001  | 0.015              | 0.004  | 0.042                      | 0.009  |
| 12 | 2   | C12H22O2 | 0.003            | 0.003  | 0.032              | 0.006  | 0.049                      | 0.011  |
| 12 | 3   | C12H20O2 | -0.005           | 0.004  | 0.034              | 0.007  | 0.047                      | 0.013  |

|    |   |          |        |        |        |       |       |       |
|----|---|----------|--------|--------|--------|-------|-------|-------|
| 12 | 4 | C12H18O2 | -0.009 | 0.003  | 0.025  | 0.007 | 0.045 | 0.011 |
| 13 | 1 | C13H26O2 | 0.003  | 0.001  | 0.014  | 0.003 | 0.041 | 0.008 |
| 13 | 2 | C13H24O2 | 0.006  | 0.004  | 0.037  | 0.007 | 0.048 | 0.013 |
| 13 | 3 | C13H22O2 | -0.003 | 0.004  | 0.034  | 0.008 | 0.042 | 0.014 |
| 13 | 4 | C13H20O2 | -0.008 | 0.004  | 0.030  | 0.007 | 0.043 | 0.014 |
| 14 | 1 | C14H28O2 | 0.000  | 0.002  | 0.009  | 0.004 | 0.026 | 0.010 |
| 14 | 2 | C14H26O2 | 0.014  | 0.004  | 0.039  | 0.008 | 0.051 | 0.016 |
| 14 | 3 | C14H24O2 | 0.004  | 0.020  | 0.005  | 0.009 | 0.008 | 0.016 |
| 14 | 4 | C14H22O2 | -0.004 | 0.004  | 0.028  | 0.008 | 0.039 | 0.015 |
| 14 | 5 | C14H20O2 | -0.006 | 0.003  | 0.022  | 0.006 | 0.038 | 0.012 |
| 15 | 1 | C15H30O2 | -0.010 | 0.003  | -0.001 | 0.005 | 0.028 | 0.006 |
| 15 | 2 | C15H28O2 | -0.002 | 0.003  | 0.021  | 0.006 | 0.037 | 0.014 |
| 15 | 3 | C15H26O2 | -0.003 | 0.004  | 0.022  | 0.006 | 0.032 | 0.015 |
| 15 | 4 | C15H24O2 | 0.002  | 0.002  | 0.005  | 0.004 | 0.047 | 0.007 |
| 15 | 5 | C15H22O2 | 0.017  | 0.005  | 0.043  | 0.010 | 0.053 | 0.020 |
| 15 | 6 | C15H20O2 | 0.004  | 0.005  | 0.032  | 0.009 | 0.043 | 0.017 |
| 15 | 7 | C15H18O2 | -0.003 | 0.004  | 0.022  | 0.007 | 0.037 | 0.015 |
| 16 | 1 | C16H32O2 | -0.015 | 0.002  | -0.004 | 0.007 | 0.044 | 0.013 |
| 16 | 2 | C16H30O2 | 0.005  | 0.004  | 0.026  | 0.006 | 0.039 | 0.016 |
| 16 | 3 | C16H28O2 | 0.003  | 0.004  | 0.026  | 0.006 | 0.033 | 0.016 |
| 16 | 4 | C16H26O2 | -0.014 | 0.003  | -0.002 | 0.007 | 0.014 | 0.010 |
| 16 | 5 | C16H24O2 | 0.001  | 0.001  | 0.011  | 0.004 | 0.055 | 0.008 |
| 16 | 6 | C16H22O2 | 0.020  | 0.005  | 0.040  | 0.011 | 0.058 | 0.023 |
| 16 | 7 | C16H20O2 | 0.007  | 0.004  | 0.026  | 0.008 | 0.045 | 0.018 |
| 17 | 1 | C17H34O2 | -0.009 | 0.002  | 0.001  | 0.006 | 0.020 | 0.007 |
| 17 | 2 | C17H32O2 | 0.014  | 0.004  | 0.033  | 0.007 | 0.045 | 0.020 |
| 17 | 3 | C17H30O2 | 0.008  | 0.004  | 0.030  | 0.007 | 0.032 | 0.018 |
| 17 | 4 | C17H28O2 | -0.010 | 0.002  | -0.009 | 0.008 | 0.015 | 0.010 |
| 17 | 5 | C17H26O2 | 0.012  | 0.002  | 0.012  | 0.006 | 0.070 | 0.010 |
| 17 | 6 | C17H24O2 | 0.035  | 0.0045 | 0.047  | 0.014 | 0.081 | 0.028 |
| 17 | 7 | C17H22O2 | 0.020  | 0.004  | 0.033  | 0.009 | 0.057 | 0.022 |
| 18 | 1 | C18H36O2 | 0.001  | 0.002  | 0.010  | 0.004 | 0.034 | 0.006 |
| 18 | 2 | C18H34O2 | 0.026  | 0.0036 | 0.042  | 0.009 | 0.058 | 0.023 |
| 18 | 3 | C18H32O2 | 0.018  | 0.005  | 0.038  | 0.008 | 0.040 | 0.022 |
| 18 | 4 | C18H30O2 | -0.003 | 0.002  | 0.007  | 0.006 | 0.022 | 0.007 |
| 18 | 5 | C18H28O2 | 0.001  | 0.002  | 0.004  | 0.012 | 0.028 | 0.010 |
| 18 | 6 | C18H26O2 | 0.011  | 0.003  | 0.017  | 0.004 | 0.066 | 0.010 |
| 18 | 7 | C18H24O2 | 0.008  | 0.003  | 0.017  | 0.004 | 0.057 | 0.009 |
| 19 | 1 | C19H38O2 | 0.004  | 0.003  | 0.014  | 0.003 | 0.045 | 0.007 |

|    |   |          |       |        |       |       |       |       |
|----|---|----------|-------|--------|-------|-------|-------|-------|
| 19 | 2 | C19H36O2 | 0.007 | 0.003  | 0.019 | 0.004 | 0.053 | 0.009 |
| 19 | 3 | C19H34O2 | 0.027 | 0.0036 | 0.042 | 0.009 | 0.055 | 0.025 |
| 19 | 4 | C19H32O2 | 0.004 | 0.003  | 0.013 | 0.004 | 0.037 | 0.007 |
| 19 | 5 | C19H30O2 | 0.002 | 0.003  | 0.012 | 0.005 | 0.035 | 0.007 |
| 19 | 6 | C19H28O2 | 0.007 | 0.004  | 0.017 | 0.004 | 0.043 | 0.007 |
| 19 | 7 | C19H26O2 | 0.007 | 0.004  | 0.014 | 0.004 | 0.043 | 0.007 |
| 20 | 2 | C20H38O2 | 0.007 | 0.004  | 0.009 | 0.004 | 0.053 | 0.008 |
| 20 | 3 | C20H36O2 | 0.020 | 0.005  | 0.040 | 0.010 | 0.066 | 0.020 |
| 20 | 4 | C20H34O2 | 0.007 | 0.003  | 0.013 | 0.004 | 0.047 | 0.007 |
| 20 | 5 | C20H32O2 | 0.005 | 0.003  | 0.028 | 0.004 | 0.036 | 0.009 |
| 20 | 6 | C20H30O2 | 0.004 | 0.003  | 0.013 | 0.005 | 0.038 | 0.009 |
| 20 | 7 | C20H28O2 | 0.005 | 0.004  | 0.015 | 0.004 | 0.047 | 0.007 |
| 21 | 2 | C21H40O2 | 0.005 | 0.004  | 0.009 | 0.003 | 0.043 | 0.008 |
| 21 | 3 | C21H38O2 | 0.007 | 0.004  | 0.015 | 0.003 | 0.052 | 0.008 |
| 21 | 4 | C21H36O2 | 0.008 | 0.004  | 0.007 | 0.004 | 0.050 | 0.006 |
| 21 | 5 | C21H34O2 | 0.009 | 0.003  | 0.009 | 0.004 | 0.039 | 0.008 |
| 21 | 6 | C21H32O2 | 0.007 | 0.004  | 0.015 | 0.004 | 0.040 | 0.008 |
| 21 | 7 | C21H30O2 | 0.005 | 0.004  | 0.007 | 0.004 | 0.044 | 0.008 |

39

40

41

**Table S3:** Summary of OSPW chemistry on day zero.

| Parameter                               | units | OSPW (day 0) |
|-----------------------------------------|-------|--------------|
| <b>Conductivity</b>                     | uS/cm | 1028         |
| <b>Turbidity</b>                        | NTUs  | 3.7          |
| <b>Total Hardness as CaCO3</b>          | mg/L  | 250          |
| <b>Total Alkalinity as CaCO3</b>        | mg/L  | 250          |
| <b>Total Dissolved Solids</b>           | mg/L  | 900          |
| <b>Total Suspended Solids (TSS)</b>     | mg/L  | 4.9          |
| <b>Dissolved Inorganic Carbon (DIC)</b> | mg/L  | 57           |
| <b>Dissolved Organic Carbon (DOC)</b>   | mg/L  | 22           |
| <b>Total Organic Carbon (TOC)</b>       | mg/L  | 21           |
| <b>Total O2-naphthenic acids*</b>       | mg/L  | 41           |

42 \*Total O2-naphthenic acid concentrations in OSPW were measured by InnoTech Alberta

43 (Edmonton, AB, Canada) and quantitation closely followed Pereira et al. (2013).

44

45

46 References:

47

48 Pereira, A. S., Bhattacharjee, S., & Martin, J. W. (2013). Characterization of Oil Sands Process-

49 Affected Waters by Liquid Chromatography Orbitrap Mass Spectrometry. *Environmental*

50 *Science & Technology*, 47(10), 5504–5513. <https://doi.org/10.1021/es401335t>

51
